# Supplementary material for: Engineered nanomaterials in the context of global element cycles
Source: Royal Society of Chemistry journal article supplement (doi:10.1039/c9en00322c), 2019-01-01
Supplement: c9en00322c1.pdf [file c9en00322c1.pdf]

Electronic Supplementary Information for:

**Engineered nanomaterials in the context of global element cycles**

Nina Z. Janković<sup>1,3</sup> and Desirée L. Plata<sup>\*1,2,3</sup>

<sup>1</sup>Department of Chemical and Environmental Engineering, Yale University, New Haven CT, 06511

<sup>2</sup>Department of Civil and Environmental Engineering, Massachusetts Institute of Technology, Cambridge, MA 02142

<sup>3</sup>Center for Green Chemistry and Green Engineering, Yale University, 225 Prospect Street, New Haven, CT, 06520

\*corresponding author: [dplata@mit.edu](mailto:dplata@mit.edu)

### ***Global Material Efficiencies***

Global nanomaterial production volumes were obtained from *The Global Nanotechnology and Nanomaterials Market Opportunity Report*<sup>1</sup>. The anthropogenic flows considered herein are those from mining, spanning the entire life cycle of a primary material from raw material extraction to the end-of-life phase. World mine, smelter, and/or refinery production volumes for 2014 were obtained from the U.S. Geological Survey (USGS) Minerals Yearbook, USGS Commodity Summaries, and the International Nickel Study Group (INSG) –see tables below. It should be noted that USGS minerals reports often withhold U.S. production volumes to avoid disclosing company proprietary data.

Global material efficiencies (Figure 3) across a single life cycle (i.e., rates of material flow through the life cycle within a given year) were calculated from global anthropogenic element cycles available in the literature with the exception of cobalt, copper, and nickel, where production losses were partially calculated from values reported by the USGS Minerals Yearbooks, USGS Commodity Summaries, and the INSG (refer to Table S1). Sufficient data were available for the 2014 cobalt, copper, and nickel production volumes to supplement cycling efficiencies calculated from the literature (i.e. cycles for years preceding 2014). Therefore, production efficiencies were calculated *ab initio* when possible. Primary material flows were decoupled from secondary flows, within the limit of available data, using cycling rates calculated from the literature. Efficiencies were calculated across one life cycle; therefore, stock accumulation was omitted and the entirety of materials mined were assumed to reach the end-of-life phase within the same year. The use phase and end-of-life cycling rates for copper were calculated from the International Copper Study Group (ICSG) 2013 cycle. Global material mass flows for 2014 were calculated (in Gg) from the associated material cycling rates (refer to Table S1).

### ***Details pertaining to the nickel cycle***

Nickel is extracted from two types of ores: sulfide ores and laterite ores. Sulfide ores deposits are mined underground and separated from gangue minerals through beneficiation of crushed ore, i.e. froth flotation and magnetic separation processes.

Subsequently, nickel concentrates are further purified through a leaching or smelting process. Smelting yields a nickel-iron sulfide, known as nickel matte, which can further be processed and refined into nickel metal, ferronickel, nickel oxide sinter, and nickel chemicals. Lateritic ores are found near the surface and are mined in earth-moving operations. Laterite ores are typically low-grade deposits, which are “difficult to concentrate by common ore beneficiation processes”<sup>2</sup>. Thus, large amounts of laterite ore must be smelted to concentrate the contained nickel. Laterite ore processing includes a variety of hydrometallurgical techniques (i.e. leaching) followed by solvent extraction-electrowinning (SXEW). Both sulfide and laterite ores are processed to nickel matte and refined to the various nickel products (listed above), albeit through diverse metallurgical routes. From the 2005 Ni cycle, the largest losses of nickel to tailings are from crushing/milling sulfide ore.

Nickel production losses (i.e. tailings and slag) were 18% of ore production (i.e. extracted metal) in 2005<sup>3</sup> and 29% in 2014 (Table S1). The same loss rate to tailings in 2005, calculated from Reck<sup>3</sup>, was applied to the 2014 cycle in the absence of sufficient 2014 data. However, sufficient data was available to calculate losses to slag, leaching, and refining. The production efficiency of nickel fell 11% between 2005 and 2014 (Table S1). This shift in production efficiency can be reconciled by (1) an increase in lower grade ore mining, (2) a redundancy in reported mine and plant production efficiency, or (3) a discrepancy in data sources used. To interrogate (1), the reported mine production figures must be dissected. The USGS reports mine production as laterite ore, concentrates (assumed to originate from sulfide ore), ore and ore milled (assumed to originate from sulfide ore), ferronickel, nickel sulfate, and unspecified/undifferentiated. The latest USGS data available with the above breakdown for mine production is 2013. The USGS world mine production figure for 2014 used here is reported only as a total sum of world mine production. In 2005 concentrates dominated the world mine production value, accounting for 35% of the total; conversely in 2013 laterite ore dominated mine production, accounting for 52% of the total. Laterite ore mine production dramatically increased after 2011 (likely to accommodate the increase in China’s nickel pig iron production). The increase in mining lower grade ores may account for the decrease in production rate of refined nickel products. An increase in laterite ore mining implies an increase in losses to leaching and slag, not to tailings. Thus, the 11% difference is likely

an overestimate, assuming nickel losses to tailings were predominantly from milling of sulfide ore (similarly to 2005), whose production has remained stable since 2005. A redundancy in data reported for mine production and refinery production (nickel products) could not exclusively account for the totality of the 11% discrepancy, as ferronickel and nickel sulfide make up a small portion of the reported mine production.

Finally, the source data for 2005 nickel production was the INSG, which reports mine production as nickel contained in laterite ore mined and nickel contained in sulfide ore concentrates. Additionally, losses to tailings and slag were calculated from company data for 2005. While the data sources for mine production differ from 2005 and 2014, resolving an 11% divergence in production efficiency based on a discrepancy in reporting alone is unlikely. Nevertheless, a combination of any of the factors described above could certainly account for the observed divergence.

|                     |                      | WORLD PRODUCTION                         |          |                 |                                              |                            |                             |                             | F&M                                    | USE                 |                        |                         | Enters Waste Management |           |                          |
|---------------------|----------------------|------------------------------------------|----------|-----------------|----------------------------------------------|----------------------------|-----------------------------|-----------------------------|----------------------------------------|---------------------|------------------------|-------------------------|-------------------------|-----------|--------------------------|
|                     |                      | Enters Fabrication, Manufacturing, & Use |          |                 |                                              |                            |                             |                             |                                        |                     |                        |                         |                         |           |                          |
| Element             | Cycle Year           | Ore Production                           | Tailings | Mine Production | Slag, Leaching, Dross, By-products, Residues | Primary Smelter Production | Primary Refinery Production | Total Production Losses (b) | Fabrication & Manufacturing Losses (c) | Flow from use phase | In-use Dissipation (d) | In-use Dissipation Rate | Discards                | Recycling | Non-functional Recycling |
| Ag (Gg)             | 1997                 | 20.2                                     | 4        | 16.2            |                                              |                            | 14.8                        | 5.4                         |                                        |                     |                        |                         | 14.02                   | 7.95      |                          |
|                     | (a)                  | 100%                                     | 20%      | 80%             | 7%                                           |                            | 73%                         | 27%                         |                                        |                     |                        |                         |                         | 42%       |                          |
|                     | 2014                 | 33.4                                     | 6.62     | 26.8            | 2.32                                         |                            | 24.5                        | 8.94                        |                                        |                     |                        |                         |                         | 13.9      |                          |
| Al (Gg)             | 2009                 | 37200                                    | 7400     | 29800           | 400                                          | 29700                      | 29400                       | 7800                        |                                        | 19100               | 1200                   | 6%                      | 17900                   | 9800      |                          |
|                     | (a)                  | 100%                                     | 20%      | 80%             | 1%                                           | 80%                        | 79%                         | 21%                         |                                        |                     | 5%                     |                         |                         | 41%       |                          |
|                     | 2014                 | 67590                                    | 13445    | 54145           | 727                                          | 53963                      | 53418                       | 14172                       |                                        |                     | 3356                   |                         |                         | 27408     |                          |
| Ce (Gg)             | 2007                 | 42                                       | 8.4      | 33.6            | 3.3                                          |                            | 30.3                        | 11.7                        | 4.4                                    |                     |                        |                         | 21.6                    |           |                          |
|                     | (a)                  | 100%                                     | 20%      | 80%             | 8%                                           |                            | 72%                         | 28%                         | 10%                                    |                     |                        |                         |                         |           |                          |
|                     | 2014                 | 63.6                                     | 12.7     | 50.9            | 5.00                                         |                            | 45.9                        | 17.7                        | 6.66                                   |                     |                        |                         |                         |           |                          |
| Co (Gg)             | 2005                 | 126.7                                    | 63.35    | 63.35           | 9.272                                        |                            | 54.078                      | 72.622                      |                                        |                     |                        |                         | 40.523                  | 9.009     | 3.643                    |
|                     | (a)                  | 100%                                     | 50%      | 50%             | 7%                                           |                            | 43%                         | 57%                         |                                        |                     |                        |                         |                         | 9%        | 4%                       |
|                     | 2014                 | 246                                      | 123      | 123             | 32                                           |                            | 91.3                        | 154                         |                                        |                     |                        |                         |                         | 20.3      | 8.21                     |
| Cu (Gg)             | (a)                  | 100%                                     | 50%      | 50%             | 13%                                          |                            | 37%                         | 63%                         |                                        |                     |                        |                         |                         | 8%        | 3%                       |
|                     | 2013                 |                                          |          |                 |                                              |                            |                             |                             |                                        | 12100               | 500                    | 4%                      | 11600                   | 4050      |                          |
|                     | (a)                  | 100%                                     |          |                 |                                              |                            | 82%                         | 18%                         |                                        |                     | 3%                     |                         |                         | 27%       |                          |
| Total               | 2014                 | 22397                                    |          | 18509           |                                              |                            | 18292                       | 4105                        |                                        |                     | 756                    |                         |                         | 6122      |                          |
|                     | (a)                  | 100%                                     |          |                 | 15%                                          |                            | 85%                         | 15%                         |                                        |                     |                        |                         |                         |           |                          |
|                     | Leaching, electrowon |                                          | 4791     |                 |                                              | 719                        |                             | 4072                        | 719                                    |                     |                        |                         |                         |           |                          |
| (a)                 |                      | 100%                                     | 18%      | 82%             | 1%                                           |                            | 81%                         | 19%                         |                                        |                     |                        |                         |                         |           |                          |
| Concentrates, other |                      |                                          | 17606    | 3169            | 14437                                        | 218                        |                             | 14220                       | 3387                                   |                     |                        |                         |                         |           |                          |
|                     |                      |                                          |          |                 |                                              |                            |                             |                             |                                        |                     |                        |                         |                         |           |                          |
|                     |                      |                                          |          |                 |                                              |                            |                             |                             |                                        |                     |                        |                         |                         |           |                          |
| Fe (Gg)             | 2000                 | 694000                                   | 92000    | 602000          | 28000                                        | 574000                     |                             | 120000                      |                                        | 265000              | 8000                   | 3%                      | 351000                  | 267000    |                          |
|                     | (a)                  | 100%                                     | 13%      | 87%             | 4%                                           | 83%                        |                             | 17%                         |                                        |                     | 2%                     |                         |                         | 61%       |                          |
|                     | 2014                 | 1645642                                  | 218154   | 1427488         | 66395                                        | 1361093                    |                             | 284549                      |                                        |                     | 41090                  |                         |                         | 1004105   |                          |
| Ni (Gg)             | 2005                 | 1585                                     | 205      | 1380            | 85                                           | 1295                       |                             | 290                         |                                        |                     |                        |                         | 650                     | 410       | 105                      |
|                     | (a)                  | 100%                                     | 13%      | 87%             | 5%                                           | 82%                        |                             | 18%                         |                                        |                     |                        |                         |                         | 52%       | 13%                      |
|                     | 2014                 | 2814                                     | 364      | 2450            | 456                                          | 1994                       |                             | 820                         |                                        |                     |                        |                         |                         | 1258      | 322                      |
| Zn (Gg)             | (a)                  | 100%                                     | 13%      | 87%             | 16%                                          | 71%                        |                             | 29%                         |                                        |                     |                        |                         |                         | 45%       | 11%                      |
|                     | 2010                 | 14000                                    | 1800     | 12200           | 760                                          | 11440                      |                             | 2560                        |                                        | 8300                | 1100                   | 13%                     | 10100                   | 4700      |                          |
|                     | (a)                  | 100%                                     | 13%      | 87%             | 5%                                           | 82%                        |                             | 18%                         |                                        |                     | 11%                    |                         |                         | 33%       |                          |
|                     | 2014                 | 15294                                    | 1966     | 13327           | 830                                          | 12497                      |                             | 2797                        |                                        |                     | 1656                   |                         |                         | 5045      |                          |

**Table S1.** Bolded and italicized data are 2014 production values reported by USGS and/or INSG. These values provide a starting basis for calculation of all other 2014 global material efficiency values (i.e., data presented in Figure 3 and in the 2014 rows listed here), where that calculation relies on various element cycling rate data calculated from the listed references on an element-by-element basis.

(a) Global material efficiencies were calculated across a single life cycle of the particular element; primary materials were deconvoluted from secondary materials to the extent possible.

(b) Total losses during production are titled as "Tailings & Slag" in Figure 4.; this value includes all production losses (e.g. leaching, dross).

(c) Fabrication and manufacturing losses, originating from primary materials, were calculated for cerium, as there are no secondary cerium sources, i.e. the EOL-RR for Ce is zero. Fabrication and manufacturing losses for all other cycles are assumed to be zero.

(d) In-use dissipation is relevant to Al, Cu, Fe, and Zn cycles; these are flows from the use phase that do not enter waste management.

(e) Dissipation is the flow of waste from waste management that is informally discarded directly to the environment. This definition is specific to the Ag cycle.

(f) For the iron cycle, landfill flow includes end-of-life dispersion to the environment.

|                                          |                         | WASTE MANAGEMENT |                     |                |                  |                               | END-OF-LIFE RATES                   |                               |                  |               |                   |                       |                                    |
|------------------------------------------|-------------------------|------------------|---------------------|----------------|------------------|-------------------------------|-------------------------------------|-------------------------------|------------------|---------------|-------------------|-----------------------|------------------------------------|
| Element                                  | Cycle Year              |                  |                     |                |                  |                               | Recycling Rate                      |                               |                  |               |                   |                       |                                    |
|                                          |                         | Dissipation (e)  | Landfill (f)        | Incineration   | Other Repository | Processing or Separation Loss | End-of-life Recycling Rate (EOL-RR) | Non-functional Recycling Rate | Dissipation rate | Landfill Rate | Incineration Rate | Other Repository Rate | Processing or Separation Loss Rate |
| Ag (Gg)                                  | 1997 (a) 2014           | 2.1 11% 3.67     | 4 21% 6.99          |                |                  |                               | 57%                                 |                               | 15%              | 29%           |                   |                       |                                    |
| Al (Gg)                                  | 2009 (a) 2014           |                  |                     | 4700 19% 13145 | 3200 13% 8950    | 200 1% 559                    | 55%                                 |                               |                  |               | 26%               | 18%                   | 1%                                 |
| Ce (Gg)                                  | 2007 (a) 2014           |                  | 21.6 62% 39.2       |                |                  |                               |                                     |                               |                  | 100%          |                   |                       |                                    |
| Co (Gg)                                  | 2005 (a) 2014 (a)       |                  | 27.871 29% 62.8 26% |                |                  |                               | 22%                                 | 9%                            |                  | 69%           |                   |                       |                                    |
| Cu (Gg)                                  | 2013 (a) Total 2014 (a) |                  | 5700 38% 8617       |                |                  | 1850 12% 2797                 | 35%                                 |                               |                  | 49%           |                   |                       | 16%                                |
| Leaching, electrowon Concentrates, other | (a)                     |                  |                     |                |                  |                               |                                     |                               |                  |               |                   |                       |                                    |
| Fe (Gg)                                  | 2000 (a) 2014           |                  | 84000 19% 315898    |                |                  |                               | 76%                                 |                               |                  | 24%           |                   |                       |                                    |
| Ni (Gg)                                  | 2005 (a) 2014 (a)       |                  | 135 17% 414 15%     |                |                  |                               | 63%                                 | 16%                           |                  | 21%           |                   |                       |                                    |
| Zn (Gg)                                  | 2010 (a) 2014           |                  | 5400 38% 5796       |                |                  |                               | 47%                                 |                               |                  | 53%           |                   |                       |                                    |

**Table S1 cont'd.** Bolded and italicized data are 2014 production values reported by USGS and/or INSG. These values provide a starting basis for calculation of all other 2014 global material efficiency values (i.e., data presented in Figure 3 and in the 2014 rows listed here), where that calculation relies on various element cycling rate data calculated from the listed references on an element-by-element basis.

(a) Global material efficiencies were calculated across a single life cycle of the particular element; primary materials were deconvoluted from secondary materials to the extent possible.

(b) Total losses during production are titled as "Tailings & Slag" in Figure 4.; this value includes all production losses (e.g. leaching, dross).

(c) Fabrication and manufacturing losses, originating from primary materials, were calculated for cerium, as there are no secondary cerium sources, i.e. the EOL-RR for Ce is zero. Fabrication and manufacturing losses for all other cycles are assumed to be zero.

(d) In-use dissipation is relevant to Al, Cu, Fe, and Zn cycles; these are flows from the use phase that do not enter waste management.

(e) Dissipation is the flow of waste from waste management that is informally discarded directly to the environment. This definition is specific to the Ag cycle.

(f) For the iron cycle, landfill flow includes end-of-life dispersion to the environment.

| Element | Cycle Year | Additional Information                                                                                                                                                                                                                                                                                                                                                                                                                                                                                                                                                                                    | References                                                                                                          |
|---------|------------|-----------------------------------------------------------------------------------------------------------------------------------------------------------------------------------------------------------------------------------------------------------------------------------------------------------------------------------------------------------------------------------------------------------------------------------------------------------------------------------------------------------------------------------------------------------------------------------------------------------|---------------------------------------------------------------------------------------------------------------------|
| Ag (Gg) | 2014       | Assumed all slag and leachate originated from primary smelter/ refinery production. Data in mass of silver content.                                                                                                                                                                                                                                                                                                                                                                                                                                                                                       | Johnson et al., 2005 <sup>4</sup><br>U.S. Geological Survey Minerals Yearbook 2014 <sup>5</sup>                     |
| Al (Gg) | 2014       | Mine production is defined as the production of alumina from bauxite. Tailings include mining losses and red mud. Smelter production is defined as the production of molten Al from alumina. Refinery production is defined as the production of Al ingot. 2014 primary smelter production may include the mass of secondary aluminum ingot and alloying materials, see USGS Minerals Yearbook 2015. Data in mass of aluminum content.                                                                                                                                                                    | Liu et al., 2012 <sup>6</sup><br>U.S. Geological Survey Minerals Yearbook 2015 <sup>7</sup>                         |
| Ce (Gg) | 2014       | Rare earth elements mine production is reported in rare earth oxide equivalents by the USGS, as the rare earths occur jointly in ore deposits. CeO <sub>2</sub> content of rare earth oxides assumed to be 50% <sup>8, 9</sup> . Smelting/ refining processes are defined generally as the separation of individual rare earths from rare earth concentrates. Data reported herein is converted to cerium content.                                                                                                                                                                                        | Du and Graedel, 2011 <sup>10</sup><br>U.S. Geological Survey Minerals Yearbook 2014 <sup>11</sup>                   |
| Co (Gg) | 2014       | Approximate cobalt primary refinery production; refer to USGS Minerals Yearbook 2014 for further details on mine production and refinery production data. Refer to Harper et al. for a detailed description on waste generation in the production stages. Data in mass of cobalt content.                                                                                                                                                                                                                                                                                                                 | Harper et al., 2012 <sup>12</sup><br>U.S. Geological Survey Minerals Yearbook 2014 <sup>13</sup>                    |
| Cu (Gg) | 2014       | Mine production total, Gg: 18477      Refinery production total, primary, Gg: 18292<br>Concentrates, Gg: 14437      Other, Gg: 14220<br>Leaching, electrowon, Gg: 4040      Electrowon, Gg: 4072                                                                                                                                                                                                                                                                                                                                                                                                          | U.S. Geological Survey Minerals Yearbook 2014 <sup>15</sup>                                                         |
|         |            | The difference in mine production and refinery production of electrowon Cu (produced by the SXEW (solvent extraction/ electrowinning-process)) is due to a discrepancy between Zambia's mine production (leaching, electrowon estimate) and refinery production (electrowon figure). Herein, the reported refinery electrowon Cu figure is used. Data in mass of copper content.                                                                                                                                                                                                                          | U.S. Geological Survey Minerals Yearbook 2014 <sup>15</sup>                                                         |
|         |            | Cu losses in the SXEW-process are assumed to be 15% of ore production. Cu losses in the production of concentrates using the pyrometallurgical process are assumed to be 18% of ore production. Note that typically the smelting process is ~97% efficient and the electrolytic refining process is ~99% efficient (these values were not applied here). Herein, the waste resulting from smelting and refining is calculated as the difference between mine production and primary refinery production. Refer to supplemental information of Glöser et al., 2013 for details on Cu production processes. | Glöser et al., 2013 <sup>14</sup>                                                                                   |
|         |            | Waste management and in-use dissipation rates extracted from International Copper Study Group figure: <i>Industry Global Flows of Copper (2013) and Derived Recycling Rates</i> .                                                                                                                                                                                                                                                                                                                                                                                                                         | International Copper Study Group, 2015 <sup>16</sup>                                                                |
| Fe (Gg) | 2014       | Assumed all slag and by-products originated from primary smelter/ refinery production. Smelter and refinery production is not differentiated; the reported figure represents the flow relevant to fabrication and manufacturing life stages. Mine production represents the total usable ore produced. Data in mass of iron content.                                                                                                                                                                                                                                                                      | Wang et al., 2007 <sup>17</sup><br>U.S. Geological Survey Minerals Yearbook 2014-Advance Data Release <sup>18</sup> |
| Ni (Gg) | 2014       | Assumed all slag originated from primary smelter production. Smelting and refining processes are not differentiated. Relevant flow of extracted nickel into fabrication and manufacturing is considered. Data in mass of nickel content.                                                                                                                                                                                                                                                                                                                                                                  | Reck and Graedel, 2012 <sup>3</sup>                                                                                 |
|         |            | 2005 mine production composition, and associated losses to tailings, assumed to be representative for 2014, due to lack of detailed mine production data. Refer to 2005 nickel study <sup>19</sup> . A detailed discussion can be found above.                                                                                                                                                                                                                                                                                                                                                            | U.S. Geological Survey Mineral Commodity Summaries 2016 <sup>20</sup>                                               |
|         |            | Primary nickel production defined as the flow nickel originating from mine production and purified through smelting and/ or refining processes.                                                                                                                                                                                                                                                                                                                                                                                                                                                           | International Nickel Study Group, World Nickel Statistics 2015 <sup>21</sup>                                        |
| Zn (Gg) | 2014       | Global anthropogenic Zn cycle base case considered. Assumed all slag originated from primary smelter production; smelter production consists of zinc slab, which flows to fabrication and manufacturing. Data in mass of zinc content.                                                                                                                                                                                                                                                                                                                                                                    | Meylan and Reck, 2015 <sup>22</sup><br>U.S. Geological Survey Minerals Yearbook 2014 <sup>23</sup>                  |

**Table S1 cont'd.** Bolded and italicized data are 2014 production values reported by USGS and/or INSG. These values provide a starting basis for calculation of all other 2014 global material efficiency values (i.e., data presented in Figure 3 and in the 2014 rows listed here), where that calculation relies on various element cycling rate data calculated from the listed references on an element-by-element basis.

(a) Global material efficiencies were calculated across a single life cycle of the particular element; primary materials were deconvoluted from secondary materials to the extent possible.

(b) Total losses during production are titled as "Tailings & Slag" in Figure 4.; this value includes all production losses (e.g. leaching, dross).

(c) Fabrication and manufacturing losses, originating from primary materials, were calculated for cerium, as there are no secondary cerium sources, i.e. the EOL-RR for Ce is zero. Fabrication and manufacturing losses for all other cycles are assumed to be zero.

(d) In-use dissipation is relevant to Al, Cu, Fe, and Zn cycles; these are flows from the use phase that do not enter waste management.

(e) Dissipation is the flow of waste from waste management that is informally discarded directly to the environment. This definition is specific to the Ag cycle.

(f) For the iron cycle, landfill flow includes end-of-life dispersion to the environment.

## Glossary

**Note that general definitions are given here, and we direct the readers to the primary literature sources for *scope and system boundaries*.**

**Anthropogenic element cycles** account for the stocks and flows of materials mobilized through human activity across relevant reservoirs/compartments.

**Dissipation:** The non-recovered portion of discards lost to the environment. *In-use dissipation:* materials lost to the environment during the use phase. *Related:* Dispersion.

**Dross:** Solid impurities present in molten metals during smelting.

**Fabrication and manufacturing losses:** Wastes from fabrication of semi-fabricated products and final products that enter the use phase (e.g., industrial scrap).

**Fabrication, manufacturing, and use phase:** Fabrication of semi-products (e.g., sheets, rolls), followed by the manufacturing process to transform materials into final goods. The resultant mass fraction of material goods flows to the use phase.

**Incineration:** Portion of discards disposed via burning (may include waste-to-energy).

**Landfill:** The non-recovered portion of material that enters waste management and recycling is assumed to be landfilled or lost to the environment.

**Leaching:** The extraction of minerals from ore through dissolution in acidic solutions.

**Mine production:** Production of mineral concentrates and/ or usable ore through one or more beneficiation steps. Mine production is the difference between ore production and tailings.

**Nano:** Mass fraction of engineered nanomaterials.

**Natural element cycles** account for natural material stocks and flows, or biogeochemical pathways by which elements are transformed and moved, through relevant geological and biological reservoirs or environmental compartments.

**Nonfunctional recycling:** Recovered material for another use in which that particular element's properties are *not* required/utilized.

**Ore production (i.e., extraction):** Metal content of ore removed from the lithosphere.

**Other repository:** Unidentified portion of materials entering waste management and recycling, this compartment likely arises to balance masses at the end-of-life. See primary cycle source.

**Primary refinery production:** Refining can include a variety of metallurgical purification techniques, such as electrolysis. Refining is the final processing step in production of pure metal (or alloy), which enters the fabrication stage, where semi-fabricated products such as metal sheets, plates, and rolls are produced. Primary refinery production is the difference between ore production and the total production/ separations wastes (as wastes originate only from primary sources herein).

**Primary smelter production:** Production of elemental metal from mineral concentrates, through the reduction of metal oxides. Smelting utilizes heat and reducing agents to reduce the desired metal and extract it from concentrates. Primary smelter production is the difference between mine production and slag (as slag originates only from primary sources herein).

**Processing loss:** Loss of discards due to processing of waste at the end-of-life.  
*Related:* Separations loss.

**Recycling:** Recovered fraction of mass that enters waste management and recycling (i.e., discards). Refer to source cycle for more detail (e.g., obsolete scrap, industrial scrap). *Functional recycling:* Material is recycled for another use in which that particular element's properties are required/utilized.

**Residues:** General term for separations waste/by-products generated in metallurgical processing.

**Slag:** The by-product of smelting. Slags are separations waste generated in metal smelting.

**Tailings:** Uneconomic portion of materials found in ore deposits (gangue). Gangue is separated from the mineral of interest typically through a beneficiation process that includes the crushing or milling of ore, followed by a flotation process.

| Element         | ENM Production Volume 2014 (Gg) |               | Mine Production 2014 (Gg) | Nano-Fraction of Mine Production 2014 (%) |               |
|-----------------|---------------------------------|---------------|---------------------------|-------------------------------------------|---------------|
|                 | Low Estimate                    | High Estimate |                           | Low Estimate                              | High Estimate |
| Ag              | 0.1                             | 0.4           | 27                        | 0.5                                       | 2             |
| Au              | 0.001                           | 0.003         | 3                         | 0.04                                      | 0.1           |
| Bi              | 0.03                            | 0.05          | 11                        | 0.3                                       | 0.5           |
| Ce              | 0.7                             | 1             | 51                        | 1                                         | 2             |
| Cu              | 0.2                             | 0.5           | 18509                     | 0.001                                     | 0.002         |
| Fe <sup>a</sup> | 0.006                           | 0.03          | 1427488                   | 4E-07                                     | 2E-06         |
| Fe <sup>b</sup> | 0.006                           | 0.03          | 1427488                   | 4E-07                                     | 2E-06         |
| Ni              | 0.005                           | 0.02          | 2450                      | 2E-04                                     | 8E-04         |
| Sb              | 0.009                           | 0.02          | 158                       | 0.006                                     | 0.01          |
| Sn              | 0.09                            | 0.2           | 286                       | 0.03                                      | 0.06          |
| Ti <sup>c</sup> | 20                              | 89            | 3620                      | 0.5                                       | 2             |
| Zr <sup>d</sup> | 1                               | 26            | 671                       | 0.2                                       | 4             |
| Al              | 3                               | 5             | 54145                     | 0.005                                     | 0.01          |
| Co              | 0.004                           | 0.006         | 123                       | 0.003                                     | 0.005         |
| Mg <sup>e</sup> | 0.009                           | 0.02          | 9390                      | 1E-04                                     | 2E-04         |
| Mg <sup>f</sup> | 0.009                           | 0.02          | 970                       | 9E-04                                     | 2E-03         |
| Mn              | 0.001                           | 0.002         | 17800                     | 8E-06                                     | 1E-05         |
| Si <sup>g</sup> | 86                              | 654           | 8110                      | 1                                         | 8             |
| Si <sup>h</sup> | 86                              | 654           | 2600                      | 3                                         | 25            |
| Zn              | 5                               | 26            | 13327                     | 0.04                                      | 0.2           |

**Table S2.** All values are in metal content of the particular element; nanomaterial metal content is calculated based on assumed chemical formulas listed in Table S6. Iron composition of nanomaterial is calculated based on the assumption that the total composition of the reported production volume is (a) Fe<sub>2</sub>O<sub>3</sub> or (b) Fe<sub>3</sub>O<sub>4</sub>. (c) Ti mine production is the combination of ilmenite and rutile. (d) ZrO<sub>2</sub> content of Zr mineral concentrates assumed to be ca. 63% (Table S7). (e) Total magnesium production is assumed to be the sum of magnesite mine production and Mg metal; a fraction of Mg metal is produced from magnesite; dolomite ore production not available. (f) Primary Mg metal production; Mg content of Mg metal assumed to be ca. 100%. (g) Estimated Si content of ferrosilicon and silicon metal production. (h) Si metal production; Si content of Si metal assumed to be ca. 100%. Refer to Table S1 for further details on mine production of select elements.

We performed Web of Science Core Collection searches for the total number of publications on each nanomaterial (e.g., material name + nano) and the terms “EHS”, “environmental health and safety”, “toxicity”, “environment”, “LCA”, or “green chemistry.” We then illustrate that there is no correlation with study rate and production volumes, as an example that environmental research is seldom prioritized by market volume. Here, we are cautious to note that market volumes should not be the only prioritization criteria. Below we note details about the search criteria.

“*TOPIC*” searches title, abstract, author keywords, and Keywords Plus.

Timespan=All years.

Indexes=SCI-EXPANDED, SSCI, A&HCI, CPCI-S, CPCI-SSH, BKCI-S, BKCI-SSH, ESCI.

TOPIC: (zinc oxide) AND TOPIC: (nano) AND TOPIC: (X)  
 TOPIC: (gold) AND TOPIC: (nano) AND TOPIC: (X)  
 TOPIC: (nickel) AND TOPIC: (nano) AND TOPIC: (X)  
 TOPIC: (nanodiamond) AND TOPIC: (X)  
 TOPIC: (nanofiber) AND TOPIC: (X)  
 TOPIC: (nanoclay) AND TOPIC: (X)  
 TOPIC: (cobalt oxide) AND TOPIC: (nano) AND TOPIC: (X)  
 TOPIC: (titanium dioxide) AND TOPIC: (nano) AND TOPIC: (X)  
 TOPIC: (silicon oxide) AND TOPIC: (nano) AND TOPIC: (X)  
 TOPIC: (manganese oxide) AND TOPIC: (nano) AND TOPIC: (X)  
 TOPIC: (silver) AND TOPIC: (nano) AND TOPIC: (X)  
 TOPIC: (zirconium oxide) AND TOPIC: (nano) AND TOPIC: (X)  
 TOPIC: (cerium oxide) AND TOPIC: (nano) AND TOPIC: (X)  
 TOPIC: (fullerene) AND TOPIC: (X)  
 TOPIC: (iron oxide) AND TOPIC: (nano) AND TOPIC: (X)  
 TOPIC: (copper oxide) AND TOPIC: (nano) AND TOPIC: (X)  
 TOPIC: (bismuth oxide) AND TOPIC: (nano) AND TOPIC: (X)  
 TOPIC: (magnesium oxide) AND TOPIC: (nano) AND TOPIC: (X)  
 TOPIC: (antimony tin oxide) AND TOPIC: (nano) AND TOPIC: (X)  
 TOPIC: (aluminum oxide) AND TOPIC: (nano) AND TOPIC: (X)  
 TOPIC: (quantum dot) AND TOPIC: (X)  
 TOPIC: (dendrimers) AND TOPIC: (X)  
 TOPIC: (nanocellulose) AND TOPIC: (X)  
 TOPIC: (graphene) AND TOPIC: (X)  
 TOPIC: (carbon nanotube) AND TOPIC: (X)

X = toxicity, environment, EHS, environmental health and safety, LCA, or green chemistry

While the possible search queries are innumerable, we note that the specific subset of search queries performed here is meant to be representative (i.e., demonstrate a pattern, which we expect to remain similar even if alternative/ other queries are run). Quotation marks and spelling variations were **not** used in these searches (i.e., search *words* are exact). Please, refer to Web of Science search rules.

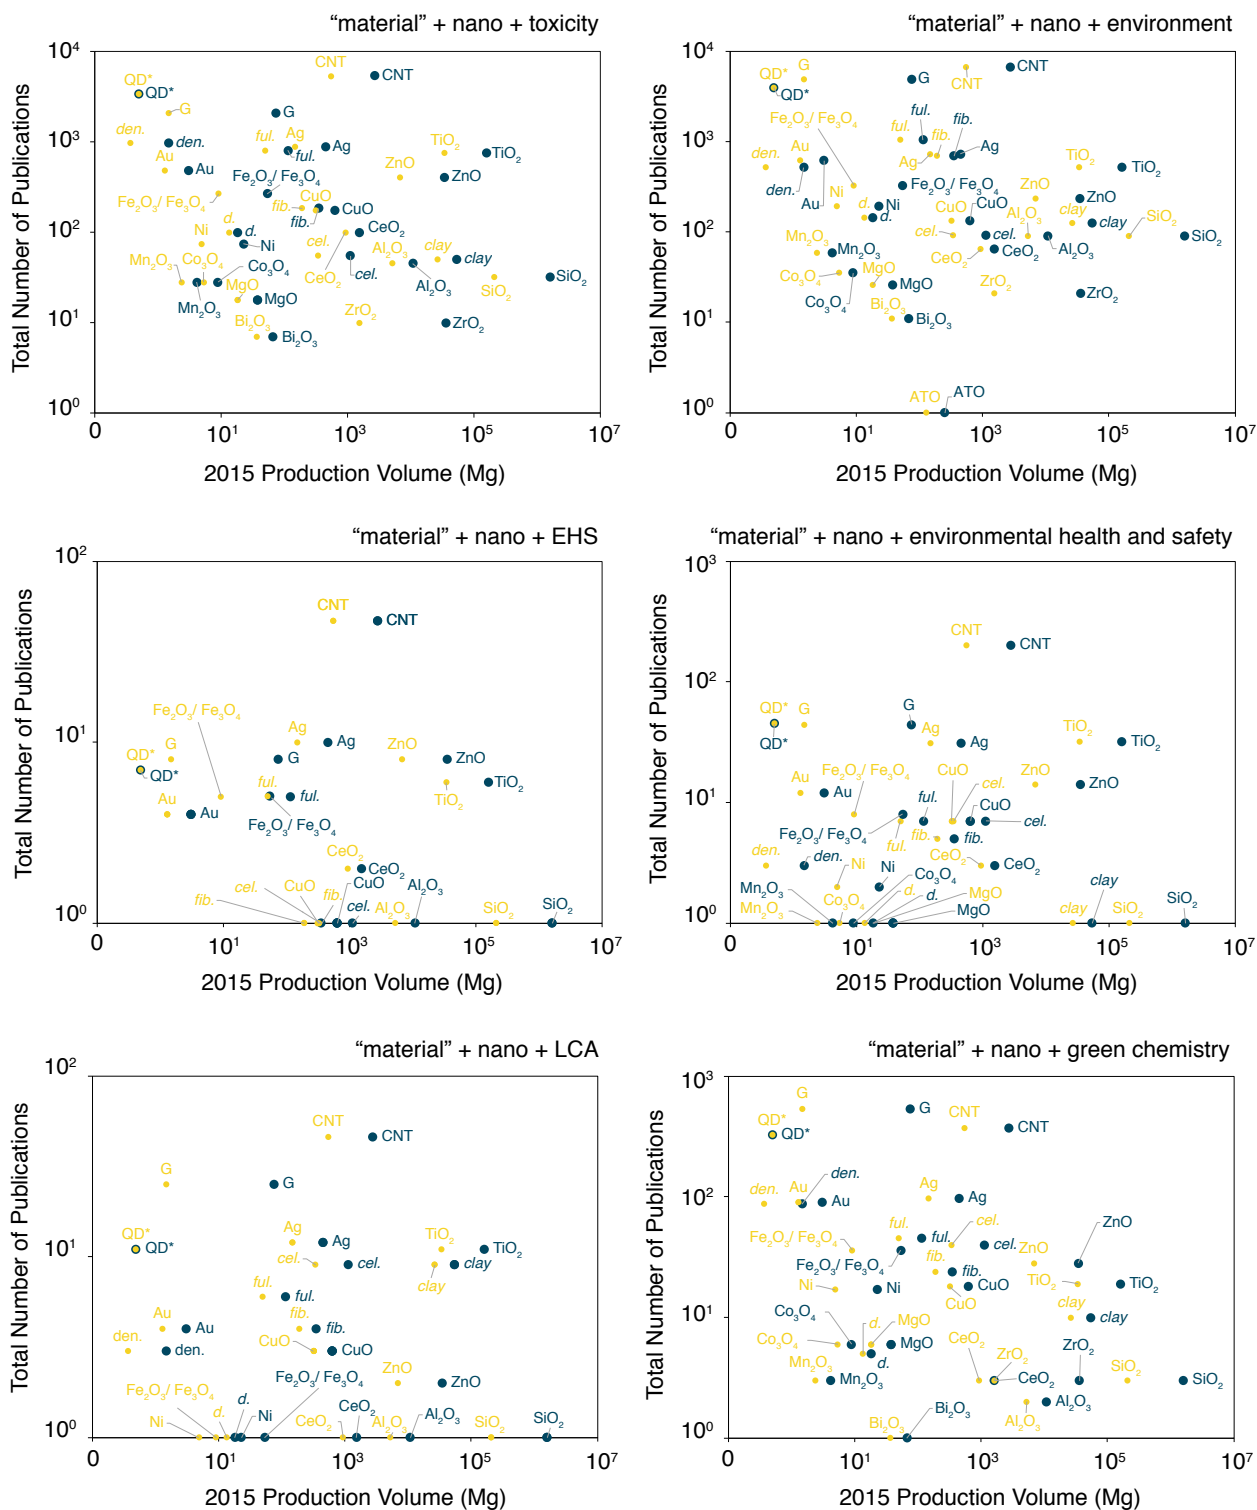

**Figure S1. *nano*-EHS research focus versus ENM production volumes.** Titles above each panel indicate words used in a Web of Science Core Collection search conducted on either June 03, 2019 (for LCA or green chemistry) or September 27, 2018 (for toxicity, environment, EHS, or environmental health and safety). Note that this is a log-log plot, and the use of log scale prevented plotting of zero values (i.e., publication search query equal to zero); these are plotted as n=1 publication. QDs (quantum dots; QDs\*) had zero production mass in 2015, and so the 2016 production volume is displayed. Colors indicate upper (blue) and lower (yellow) range of production volume estimates.

## Technology Readiness Level

| ENM                | Applied R&D                                                | Demonstration                                              | Commercial                                                                       |
|--------------------|------------------------------------------------------------|------------------------------------------------------------|----------------------------------------------------------------------------------|
| Aluminum Oxide     | Medical implants                                           | Environmental adsorbents                                   | Anti-wear coatings                                                               |
|                    | Environmental adsorbents                                   | Conductive coatings                                        | Nanofillers for polymer composites                                               |
|                    |                                                            | Filtration membranes                                       | Catalysts supports                                                               |
|                    |                                                            |                                                            | Heat transfer fluids                                                             |
|                    |                                                            |                                                            | Conductive coatings                                                              |
|                    |                                                            |                                                            | Propellants                                                                      |
|                    |                                                            |                                                            | Polishing additives                                                              |
|                    |                                                            |                                                            | Paint additives                                                                  |
|                    |                                                            |                                                            | Filtration membranes                                                             |
|                    |                                                            |                                                            | Specialty fibers                                                                 |
|                    |                                                            |                                                            | Lubricants                                                                       |
| <b>n =</b>         | <b>2</b>                                                   | <b>3</b>                                                   | <b>11</b>                                                                        |
| Antimony Tin Oxide | Smart windows                                              | Lubricant oil                                              | Anti-static coatings                                                             |
|                    | Lubricant oil                                              | Catalysts                                                  |                                                                                  |
|                    | Catalysts                                                  | Sensors (humidity, gas)                                    |                                                                                  |
|                    | Sensors (humidity, gas)                                    | LIB & SIB battery additives                                |                                                                                  |
|                    | LIB & SIB battery additives                                | EMI shielding coatings                                     |                                                                                  |
|                    | EMI shielding coatings                                     | Conductive coatings                                        |                                                                                  |
|                    | IR attenuation films and coatings                          | Conductive composites                                      |                                                                                  |
|                    |                                                            | IR attenuation films and coatings                          |                                                                                  |
| <b>n =</b>         | <b>7</b>                                                   | <b>8</b>                                                   | <b>1</b>                                                                         |
| Bismuth Oxide      | Anti-microbial coatings                                    | Medical device coatings                                    | Ceramics                                                                         |
|                    | Battery additives (anode)                                  | Medical imaging (contrast agents, nanoprobe and biolabels) |                                                                                  |
|                    | Radioprotective textiles                                   | Thermoelectric devices                                     |                                                                                  |
|                    | Sensors                                                    | Solid oxide fuel cells                                     |                                                                                  |
|                    | Medical imaging (contrast agents, nanoprobe and biolabels) | RFI shielding                                              |                                                                                  |
|                    | Thermoelectric devices                                     |                                                            |                                                                                  |
|                    | Solid oxide fuel cells                                     |                                                            |                                                                                  |
|                    | RFI shielding                                              |                                                            |                                                                                  |
| <b>n =</b>         | <b>8</b>                                                   | <b>5</b>                                                   | <b>1</b>                                                                         |
| Carbon Nanotubes   | Catalysts                                                  | Acoustics                                                  | Anti-static composites & films for electrostatic painting and static dissipation |
|                    | Imaging probes and fluorescent labels                      | PEM fuel cells                                             | Marine coatings                                                                  |
|                    | Electrochemical and gas phase hydrogen storage             | E-textiles                                                 | Battery additives                                                                |
|                    | Solar cells                                                | Electrochemical and gas phase hydrogen storage             | Data cables & power transmission lines                                           |

| ENM          | Applied R&D                                                                            | Demonstration                                                                          | Commercial                                                         |
|--------------|----------------------------------------------------------------------------------------|----------------------------------------------------------------------------------------|--------------------------------------------------------------------|
|              | Drug delivery                                                                          | Solar cells                                                                            | De-icing coatings                                                  |
|              | Conductors & semiconductors in lighter and more efficient solar cells (flexible foils) | Drug delivery                                                                          | Thermoset composites, thermoplastics, and rubber additives         |
|              | Antibacterials                                                                         | Conductors & semiconductors in lighter and more efficient solar cells (flexible foils) | Fuel system components                                             |
|              | Biosensors                                                                             | Biosensors                                                                             | Conductive additive in composites & pastes                         |
|              |                                                                                        | Stretchable films for electronics                                                      | Electromagnetic Interference Shielding (EMI) composites & coatings |
|              |                                                                                        | Supercapacitor additives                                                               | Automotive polymer composites                                      |
|              |                                                                                        | Chemical sensors                                                                       | Sporting goods composites                                          |
|              |                                                                                        | Field emission devices                                                                 | Aerospace composites                                               |
|              |                                                                                        | Memory devices                                                                         | Filtration membranes                                               |
|              |                                                                                        | Fire retardant materials                                                               | Microscopy (TEM grids, SPM tips, AFM tips)                         |
|              |                                                                                        | TCF additives                                                                          | EMI, ESD and antistatic, shielding coatings & composites           |
|              |                                                                                        |                                                                                        | TCF additives                                                      |
| <b>n =</b>   | <b>8</b>                                                                               | <b>15</b>                                                                              | <b>16</b>                                                          |
| Cellulose    | Anti-static coatings                                                                   | Cement additives                                                                       | Cement additives                                                   |
|              | E-textiles                                                                             | Printing paper                                                                         | Printing paper                                                     |
|              | Drug delivery                                                                          | Polymer composites in plastics packaging                                               | Polymer composites in plastics packaging                           |
|              | Sensors                                                                                | Anti-static coatings                                                                   | Transparent barrier films in food packaging                        |
|              | Aerospace composites                                                                   | Transparent barrier films in food packaging                                            | Rheology modifiers                                                 |
|              | Medical implants                                                                       | Self-cleaning coatings                                                                 | Paper composites                                                   |
|              | Drilling fluids in oil and gas                                                         | Filtration membranes                                                                   | Hygiene products                                                   |
|              |                                                                                        | Insulation                                                                             | Filter media                                                       |
|              |                                                                                        | Paint additives                                                                        |                                                                    |
|              |                                                                                        | 3D printing additives                                                                  |                                                                    |
|              |                                                                                        | Automotive composites                                                                  |                                                                    |
|              |                                                                                        | Drilling fluids in oil and gas                                                         |                                                                    |
| <b>n =</b>   | <b>7</b>                                                                               | <b>12</b>                                                                              | <b>8</b>                                                           |
| Cerium Oxide | Conductive coatings                                                                    | Solid oxide fuel cells                                                                 | Polishing slurries                                                 |
|              | Sensors                                                                                | Anti-corrosion additives                                                               | UV absorbers                                                       |
|              | Hydrogen production                                                                    |                                                                                        | Fuel additives                                                     |
|              | Bioscaffolds                                                                           |                                                                                        | Catalysts                                                          |
|              | Therapeutic agents                                                                     |                                                                                        |                                                                    |
|              | Catalytic antioxidants                                                                 |                                                                                        |                                                                    |
| <b>n =</b>   | <b>6</b>                                                                               | <b>2</b>                                                                               | <b>4</b>                                                           |
| Clays        | Medical implants                                                                       | Medical implants                                                                       | Barrier films in packaging                                         |
|              | Water filtration                                                                       | Water filtration                                                                       | Automotive composites                                              |
|              |                                                                                        |                                                                                        | Automotive tire additives                                          |
|              |                                                                                        |                                                                                        | Rheology modifiers                                                 |

| ENM          | Applied R&D                               | Demonstration                              | Commercial                                 |
|--------------|-------------------------------------------|--------------------------------------------|--------------------------------------------|
|              |                                           |                                            | Flame retardant plastic additives          |
| <b>n =</b>   | <b>2</b>                                  | <b>2</b>                                   | <b>5</b>                                   |
| Cobalt Oxide | LIB electrode additives                   | LIB electrode additives                    | Magnetic fluids                            |
|              | Electrochromic devices                    | Electrochromic devices                     | Catalysts                                  |
|              | Sensors                                   | Sensors                                    |                                            |
|              | Drug delivery & cancer therapy            |                                            |                                            |
| <b>n =</b>   | <b>4</b>                                  | <b>3</b>                                   | <b>2</b>                                   |
| Copper Oxide | Field emission devices                    | Gas sensors                                | Industrial catalysts                       |
|              | Super hydrophobic coatings                | Anti-microbials                            | Semiconductor additives                    |
|              | Thin film solar cells                     | Anti-oxidants                              |                                            |
|              | Filtration                                | Groundwater treatment                      |                                            |
|              | Gas sensors                               | LIB additives                              |                                            |
|              |                                           | Thin film solar cells                      |                                            |
|              |                                           | Filtration                                 |                                            |
| <b>n =</b>   | <b>5</b>                                  | <b>7</b>                                   | <b>2</b>                                   |
| Dendrimers   | Gene therapy                              | Drug delivery/ cancer therapy              | Antimicrobial agents in sexual health      |
|              | Catalytic agents                          | Water repellent coatings                   | Cosmetics                                  |
|              | Separating agents                         | Gene therapy                               | Antibody reagents                          |
|              | Chelating agents                          | Catalytic agents                           | Medical imaging                            |
|              | Water treatment                           | Separating agents                          | Inkjet inks                                |
|              | Chemical sensors                          |                                            | Water repellent coatings                   |
|              | Light harvesting                          |                                            |                                            |
|              |                                           |                                            |                                            |
| <b>n =</b>   | <b>7</b>                                  | <b>5</b>                                   | <b>6</b>                                   |
| Diamonds     | Drug & gene delivery                      | Polymer composites                         | Lubricants                                 |
|              | MRI contrast agents                       | MRI contrast agents                        | Polishing slurries                         |
|              |                                           | Thermal compounds (pastes) for electronics | Anti-friction & wear coatings              |
|              |                                           |                                            | Thermal compounds (pastes) for electronics |
| <b>n =</b>   | <b>2</b>                                  | <b>3</b>                                   | <b>4</b>                                   |
| Fibers       | Biosensors                                | Biosensors                                 | Air/ liquid filtration membranes           |
|              |                                           | Battery separators                         | Medical textiles (hydrogel dressings)      |
|              |                                           | Conductive additives for energy storage    | Bone/ skin regeneration                    |
|              |                                           | Medical textiles (hydrogel dressings)      |                                            |
|              |                                           | Bone/ skin regeneration                    |                                            |
| <b>n =</b>   | <b>1</b>                                  | <b>5</b>                                   | <b>3</b>                                   |
| Fullerenes   | Electron acceptors in polymer-based solar | Electron acceptors in polymer-based solar  | Lubricant additives                        |
|              | Polymers in supercapacitors               | Polymers in supercapacitors                | Whitening and anti-aging cosmetics         |
|              | Fuel cell catalyst                        | Fuel cell catalyst                         | Drug delivery                              |
|              | Medical imaging                           | Medical imaging                            |                                            |
|              |                                           | Drug delivery                              |                                            |
|              |                                           | Lubricant additives                        |                                            |
| <b>n =</b>   | <b>4</b>                                  | <b>6</b>                                   | <b>3</b>                                   |

| ENM             | Applied R&D                         | Demonstration                            | Commercial                             |
|-----------------|-------------------------------------|------------------------------------------|----------------------------------------|
| Gold            |                                     | MRI contrast agents                      | Biosensors                             |
|                 |                                     | Electronics                              | MRI contrast agents                    |
|                 |                                     | Cancer therapy and drug delivery         |                                        |
|                 |                                     | Gas sensors                              |                                        |
|                 |                                     | Water remediation                        |                                        |
| <b>n =</b>      | <b>0</b>                            | <b>5</b>                                 | <b>2</b>                               |
| Graphene        | Antibacterials                      | Thermal barrier                          | Antistatic coatings                    |
|                 | Optical switches                    | Supercapacitor additives                 | Battery additives                      |
|                 | Field effect transistors            | Anti-corrosion coatings                  | Sporting goods                         |
|                 | Medical device coatings             | Anti-icing coatings                      | Tires                                  |
|                 | MRI contrasts agents                | Antibacterials                           | Oilfield chemicals                     |
|                 | Stress strain actuators             | Photodetectors                           | Water filtration membranes             |
|                 |                                     | Water filtration membranes               | Electron microscopy sample supports    |
|                 |                                     | Inks & 3D printed materials              | Polymer composites                     |
|                 |                                     | Thermal management                       | Conductive inks                        |
|                 |                                     | Cement additives                         | Conductive additives for displays      |
|                 |                                     | Adhesives                                | Humidity sensors                       |
|                 |                                     | Biosensors                               | Inks & 3D printed materials            |
|                 |                                     | Lubricants                               | EMI shielding                          |
|                 |                                     | Flame retardants                         |                                        |
|                 |                                     | Paints & coatings                        |                                        |
|                 |                                     | Barriers and impermeable films           |                                        |
| <b>n =</b>      | <b>6</b>                            | <b>16</b>                                | <b>13</b>                              |
| Iron Oxide      | Fuel cell catalysts                 | Cancer therapy & drug delivery           | Magnetic storage media                 |
|                 | Thermochromic smart windows         | Magnetic bioseparation                   | MRI contrast agents                    |
|                 |                                     | Immunoassays                             | Polishing media                        |
|                 |                                     | Hyperthermia agents                      |                                        |
|                 |                                     | Propellants                              |                                        |
|                 |                                     | Environmental remediation                |                                        |
|                 |                                     | Magnetic coatings                        |                                        |
|                 |                                     | Biosensors                               |                                        |
|                 |                                     | MRI contrast agents                      |                                        |
| <b>n =</b>      | <b>2</b>                            | <b>9</b>                                 | <b>3</b>                               |
| Magnesium Oxide | IR attenuation films and coatings   | Fuel additives                           | Catalysts                              |
|                 | Antibacterials                      | High-temperature dehydrating agents      | Flame retardants                       |
|                 | Cancer therapy                      | Superconductors                          | Refractory material in furnace linings |
|                 | Gas sensors                         | Fuel additives (e.g. rocket propellants) |                                        |
|                 | Adsorbent for toxic chemical agents | IR attenuation films and coatings        |                                        |
|                 |                                     | Antibacterials                           |                                        |
|                 |                                     | Gas sensors                              |                                        |

| ENM              | Applied R&D                         | Demonstration                    | Commercial                                 |
|------------------|-------------------------------------|----------------------------------|--------------------------------------------|
|                  | Adsorbent for toxic chemical agents |                                  |                                            |
| <b>n =</b>       | <b>5</b>                            | <b>8</b>                         | <b>3</b>                                   |
| Manganese Oxide  | Electrocatalysts                    | MRI contrast agents              |                                            |
|                  | Water purification                  | Anode materials in LIBs          |                                            |
|                  | Supercapacitor additives            | Water purification               |                                            |
|                  | Biosensors                          | Supercapacitor additives         |                                            |
|                  | Electrochemical sensors             | Biosensors                       |                                            |
|                  |                                     | Electrochemical sensors          |                                            |
| <b>n =</b>       | <b>5</b>                            | <b>6</b>                         | <b>0</b>                                   |
| Nickel           | Catalysts                           | Magnetic fluids                  |                                            |
|                  | Conductive coatings                 | Propellant additives             |                                            |
|                  | Electrochromic coatings             | Catalysts                        |                                            |
|                  |                                     | Conductive coatings              |                                            |
|                  |                                     | Electrochromic coatings          |                                            |
| <b>n =</b>       | <b>3</b>                            | <b>5</b>                         | <b>0</b>                                   |
| Quantum Dots     | Quantum switches/ quantum computing | Thin film solar cells            | Edge optic LCDs in TVs                     |
|                  | Printable solar cells               | On chip LCDs in TVs              | On surface LCDs in TVs                     |
|                  | Thin film solar cells               | Medical contrast agents          | Medical contrast agents                    |
|                  | Solar windows                       | Biosensors                       | Security inks & tags                       |
|                  | Drug delivery                       | Infrared imaging                 | Image sensors                              |
|                  |                                     | Security inks & tags             |                                            |
|                  |                                     | QD lasers                        |                                            |
| <b>n =</b>       | <b>5</b>                            | <b>7</b>                         | <b>5</b>                                   |
| Silicon Dioxide  | Sensors                             | Catalysts                        | Rubber and plastic additives               |
|                  |                                     | Silicon nanowires in electronics | Coating additives                          |
|                  |                                     | Sensors                          | Cosmetics additives                        |
|                  |                                     |                                  | Fillers in nanocomposites                  |
|                  |                                     |                                  | Structural adhesives                       |
|                  |                                     |                                  | Automotive tire additives                  |
|                  |                                     |                                  | Cement additives                           |
| <b>n =</b>       | <b>1</b>                            | <b>3</b>                         | <b>7</b>                                   |
| Silver           | Smart glass                         | Smart glass                      | Antimicrobial wound care                   |
|                  |                                     | Water filtration & purification  | Antimicrobial medical devices              |
|                  |                                     |                                  | Textiles                                   |
|                  |                                     |                                  | Antimicrobial coatings                     |
|                  |                                     |                                  | Cosmetics & personal care additives        |
|                  |                                     |                                  | Conductive inks & films                    |
|                  |                                     |                                  | Food packaging                             |
| <b>n =</b>       | <b>1</b>                            | <b>2</b>                         | <b>8</b>                                   |
| Titanium Dioxide | Microfluidic devices                | Theranostics                     | Photovoltaics (dye-sensitized solar cells) |

| ENM             | Applied R&D                               | Demonstration                             | Commercial                                                            |
|-----------------|-------------------------------------------|-------------------------------------------|-----------------------------------------------------------------------|
|                 | Non-volatile memristive devices           | Solar fuel generation via water splitting | Sunscreens & cosmetics                                                |
|                 | Solar fuel generation via water splitting | Photocatalysts for environmental          | Photocatalytic self-cleaning coatings                                 |
|                 | Theranostics                              |                                           |                                                                       |
| <b>n =</b>      | <b>4</b>                                  | <b>3</b>                                  | <b>3</b>                                                              |
| Zinc Oxide      |                                           |                                           | Sunscreens & cosmetics                                                |
|                 |                                           |                                           | UV absorbers for paints, coatings, plastics/<br>synthetics & textiles |
|                 |                                           |                                           | Antimicrobial and bacteriostatic agent                                |
|                 |                                           |                                           | Adhesives                                                             |
|                 |                                           |                                           | Electrically conductive applications                                  |
| <b>n =</b>      | <b>0</b>                                  | <b>0</b>                                  | <b>5</b>                                                              |
| Zirconium Oxide | Cancer diagnostics                        | Fuel cell additives                       | Resins for optics                                                     |
|                 |                                           | Biomedical implant coatings               | Thermal barrier coatings                                              |
|                 |                                           | Dental composites                         | Ceramics additives                                                    |
|                 |                                           | Polymer additives                         | Refractory products                                                   |
|                 |                                           |                                           | Cement additives                                                      |
|                 |                                           |                                           | Catalysts                                                             |
|                 |                                           |                                           | Oxygen sensors                                                        |
| <b>n =</b>      | <b>1</b>                                  | <b>4</b>                                  | <b>7</b>                                                              |

**Table S3.** Technology readiness level<sup>1</sup>

## Engineered Nanomaterial Global Production Volumes (Mg)

| ENM                | ENM Formula                                                       | 2010          | 2011          | 2012          | 2013           | 2014           | 2015           | 2016           | 2017           | 2018           | 2019           | 2020           | 2021           | 2022           | 2023           | 2024           | 2025           |
|--------------------|-------------------------------------------------------------------|---------------|---------------|---------------|----------------|----------------|----------------|----------------|----------------|----------------|----------------|----------------|----------------|----------------|----------------|----------------|----------------|
| Aluminum Oxide     | Al <sub>2</sub> O <sub>3</sub>                                    | 4250-7800     | 4400-8200     | 4500-8750     | 4725-9400      | 4960-10100     | 5200-10870     | 5500-11700     | 5750-12550     | 6000-13500     | 6400-14650     | 6800-15900     | 7250-17300     | 7750-18900     | 8300-20600     | 8800-22450     | 9500-24450     |
| Antimony Tin oxide | SnO <sub>2</sub> /Sb <sub>2</sub> O <sub>5</sub><br>(90%/10% wt.) | 90-160        | 95-170        | 100-185       | 110-200        | 120-225        | 130-255        | 140-290        | 150-320        | 165-360        | 180-410        | 195-460        | 210-505        | 225-555        | 240-610        | 260-670        | 275-740        |
| Bismuth oxide      | Bi <sub>2</sub> O <sub>3</sub>                                    | 25-32         | 27-37         | 30-43         | 32-49          | 35-57          | 37-67          | 40-80          | 43-88          | 46-97          | 52-108         | 58-118         | 61-130         | 65-143         | 70-170         | 75-188         | 80-205         |
| Carbon nanotubes   | C                                                                 | 350-1700      | 400-1700      | 400-2000      | 450-2200       | 520-2500       | 550-2750       | 585-2850       | 615-3150       | 650-3300       | 685-3500       | 710-3750       | 750-4000       | 785-4300       | 810-5700       | 850-6100       | 915-7000       |
| Cellulose          | (C <sub>6</sub> H <sub>10</sub> O <sub>5</sub> ) <sub>n</sub>     | 17-17         | 41-41         | 90-175        | 200-380        | 300-800        | 345-1120       | 415-1570       | 500-2195       | 600-3077       | 735-4149       | 910-5600       | 1140-7560      | 1420-10210     | 1175-13270     | 2200-17250     | 2775-24150     |
| Cerium oxide       | CeO <sub>2</sub>                                                  | 750-1000      | 788-1090      | 800-1188      | 830-1295       | 880-1412       | 933-1539       | 989-1677       | 1048-1828      | 1111-1993      | 1177-2172      | 1248-2367      | 1323-2580      | 1402-2813      | 1486-3066      | 1576-3342      | 1670-3642      |
| Clays              | -                                                                 | 23000-40000   | 24000-44000   | 24600-46200   | 25200-48510    | 26000-51200    | 26500-54000    | 27300-57250    | 28100-60650    | 29000-64300    | 30000-68200    | 31000-72300    | 31500-77000    | 33000-82000    | 34000-87300    | 35250-93000    | 36500-99000    |
| Cobalt oxide       | Co <sub>3</sub> O <sub>4</sub>                                    | 4.8-7.0       | 4.8-7.0       | 4.9-7.5       | 5.0-8.0        | 5.2-8.5        | 5.4-9.0        | 5.6-9.5        | 5.9-10.1       | 6.2-10.7       | 6.5-11.7       | 6.8-13.0       | 7.2-14.4       | 7.5-16.0       | 7.9-17.7       | 8.3-19.7       | 8.7-21.8       |
| Copper oxide       | CuO                                                               | 200-330       | 220-380       | 240-440       | 270-490        | 290-570        | 320-640        | 350-710        | 385-790        | 420-900        | 460-1030       | 500-1150       | 550-1220       | 610-1270       | 680-1350       | 750-1450       | 830-1600       |
| Dendrimers         | -                                                                 | 0.20-0.80     | 0.25-0.90     | 0.28-1.00     | 0.31-1.12      | 0.34-1.25      | 0.37-1.48      | 0.40-1.75      | 0.44-2.06      | 0.48-2.43      | 0.54-2.97      | 0.60-3.62      | 0.67-4.52      | 0.75-5.66      | 0.83-7.07      | 0.93-8.84      | 1.03-11.05     |
| Diamonds           | C                                                                 | 8.0-10.0      | 8.8-11.3      | 9.7-12.7      | 10.7-14.3      | 12-16.2        | 13.5-18.3      | 15.2-20.8      | 17.1-23.7      | 19.3-27.3      | 21.8-31.4      | 24.6-36.4      | 27.8-42.2      | 31.4-49        | 35.5-57.3      | 40.1-67.1      | 46.2-79.1      |
| Fibers             | -                                                                 | 110-170       | 130-220       | 150-250       | 162-275        | 175-308        | 192-354        | 212-407        | 233-468        | 260-539        | 290-628        | 323-731        | 365-874        | 412-1044       | 474-1248       | 545-1491       | 627-1797       |
| Fullerenes         | C                                                                 | 20-45         | 25-60         | 30-75         | 35-81          | 40-98          | 50-115         | 60-132         | 73-148         | 87-165         | 100-183        | 112-204        | 123-231        | 136-260        | 149-294        | 164-333        | 180-376        |
| Gold               | Au                                                                | 0.8-1.8       | 0.9-2.0       | 1.0-2.0       | 1.0-3.0        | 1.1-3.0        | 1.3-3.1        | 1.5-3.2        | 1.8-3.4        | 2.0-3.7        | 2.2-4.0        | 2.4-4.3        | 2.8-4.7        | 3.1-5.1        | 3.4-5.5        | 3.8-5.9        | 4.3-6.3        |
| Graphene           | C                                                                 | 0.25-1.5      | 0.25-3        | 0.5-10        | 0.7-25         | 1-40           | 1.5-75         | 2-125          | 3-175          | 5-240          | 7-310          | 10-400         | 20-525         | 45-650         | 60-800         | 85-925         | 115-1050       |
| Iron oxide         | Fe <sub>2</sub> O <sub>3</sub> /Fe <sub>3</sub> O <sub>4</sub>    | 4.5-13        | 5-22          | 5.8-33        | 7-38           | 8.1-45         | 9.2-54         | 10.7-69        | 15-82          | 19.5-97        | 24.5-115       | 32-132         | 36.8-161       | 42.3-197       | 48.7-240       | 56-292         | 64-357         |
| Magnesium oxide    | MgO                                                               | 6-14          | 7.2-17.5      | 10-20.3       | 13-25.5        | 15-31.7        | 18.5-38        | 21-46          | 25-54.5        | 31-63          | 37-75          | 44-93          | 48.4-107       | 53-123         | 59-141         | 64-162         | 71-187         |
| Manganese oxide    | Mn <sub>2</sub> O <sub>3</sub>                                    | 1.4-1.8       | 1.4-2.2       | 1.6-2.6       | 1.8-3.1        | 2-3.5          | 2.4-4.2        | 2.4-5          | 2.8-6          | 3.3-7.1        | 3.7-8          | 4.3-8.7        | 4.7-10         | 5.2-11.5       | 5.6-13.2       | 6.2-15.2       | 6.8-17.5       |
| Nickel             | Ni                                                                | 4.0-11.0      | 4.1-12.1      | 4.2-13.9      | 4.4-16.0       | 4.6-19.2       | 4.9-23.0       | 5.1-27.7       | 5.4-33.2       | 5.6-39.8       | 5.9-47.8       | 6.3-58.5       | 6.6-71.7       | 7.0-87.8       | 7.4-109.8      | 7.8-137.2      | 8.3-171.6      |
| Quantum dots*      | -                                                                 | -             | -             | -             | -              | -              | -              | > 0.5          | -              | -              | -              | > 5            | -              | -              | -              | -              | -              |
| Silicon oxide      | SiO <sub>2</sub>                                                  | 120000-700000 | 130000-800000 | 140000-930000 | 155000-1150000 | 185000-1400000 | 210000-1600000 | 240000-1900000 | 280000-2200000 | 320000-2500000 | 365000-2800000 | 400000-3150000 | 440000-3300000 | 480000-3600000 | 496800-3888000 | 514188-4199040 | 532185-4534963 |
| Silver             | Ag                                                                | 90-320        | 100-350       | 110-370       | 120-390        | 135-420        | 150-450        | 165-475        | 185-500        | 210-530        | 230-560        | 255-600        | 280-635        | 310-670        | 350-710        | 380-753        | 410-798        |
| Titanium dioxide   | TiO <sub>2</sub>                                                  | 30000-120000  | 30600-130000  | 31500-135000  | 32150-142000   | 33000-148000   | 34000-160000   | 35000-174000   | 36000-190000   | 37250-210000   | 38500-225000   | 40000-245000   | 42000-268000   | 43500-290000   | 45560-325000   | 47500-364000   | 49500-497000   |
| Zinc oxide         | ZnO                                                               | 6000-30000    | 6000-30000    | 6150-31500    | 6250-31500     | 6390-32300     | 6845-34720     | 7190-37500     | 74560-40500    | 7960-43740     | 8440-47460     | 8945-51500     | 9525-55870     | 10145-60890    | 10800-66900    | 11500-73000    | 12250-79954    |
| Zirconium oxide    | ZrO <sub>2</sub>                                                  | 1375-31000    | 1375-32000    | 1400-32000    | 1450-33000     | 1500-35000     | 1545-36400     | 1591-37856     | 1639-39370     | 1688-40945     | 1739-42583     | 1791-44286     | 1845-46058     | 1900-47900     | 1957-50055     | 2016-52308     | 2097-54662     |

**Table S4.** Global production volume estimates from low to high in Mg. \*The quantum dot market was not reported on a mass basis, with the exception of 2016 and 2020 estimates. Global quantum dot revenues for the years 2013, 2015, and 2025 (projection), respectively: **\$40-80M; \$400-600M; \$8,000-10,000M** (from low to high estimates and rounded to one significant digit). Data adapted from *The Global Nanotechnology and Nanomaterials Market Opportunity Report*<sup>1</sup>.

| Element         | Ore Production 2014<br>(Gg) | ENM Production Volume<br>2014 (Gg) | Nano Fraction of Ore<br>Production (%) |
|-----------------|-----------------------------|------------------------------------|----------------------------------------|
| Ag              | 33.4                        | 0.4                                | 1%                                     |
| Al              | 67590                       | 5                                  | 0.008%                                 |
| Ce              | 63.6                        | 1                                  | 2%                                     |
| Co              | 246                         | 0.006                              | 0.003%                                 |
| Cu              | 22397                       | 0.5                                | 0.002%                                 |
| Fe <sup>a</sup> | 1645642                     | 0.03                               | 0.000002%                              |
| Fe <sup>b</sup> |                             | 0.03                               | 0.000002%                              |
| Ni              | 2814                        | 0.02                               | 0.0007%                                |
| Zn              | 15294                       | 26                                 | 0.2%                                   |

**Table S5.** Nanomaterial production volumes are based on the high 2014 estimates. All values are in metal content of the particular element; nanomaterial metal content is calculated based on assumed chemical formulas listed in Table S6. Iron composition of nanomaterial is calculated based on the assumption that the total composition of the reported production volume is (a) Fe<sub>2</sub>O<sub>3</sub> or (b) Fe<sub>3</sub>O<sub>4</sub>.

## SUMMARY OF GLOBAL ANTHROPOGENIC MATERIAL EFFICIENCIES

| Element | Cycle Year | Ore Production  | Enters Fabrication, Manufacturing, & Use | Total Production Losses | Fabrication & Manufacturing Losses | In-use Dissipation | Recycling      | Non-functional Recycling | Dissipation | Landfill, Dispersion and/or Incineration | Other Repository | Processing or Separation Loss | Nano              |
|---------|------------|-----------------|------------------------------------------|-------------------------|------------------------------------|--------------------|----------------|--------------------------|-------------|------------------------------------------|------------------|-------------------------------|-------------------|
| Ag (Gg) | 2014       | 100%<br>33.4    | 73%<br>24.5                              | 27%<br>8.94             |                                    |                    | 42%<br>13.9    |                          | 11%<br>3.67 | 21%<br>6.99                              |                  |                               | 1%<br>0.4         |
| Al (Gg) | 2014       | 100%<br>67600   | 79%<br>53400                             | 21%<br>14200            |                                    | 5%<br>3360         | 41%<br>27400   |                          |             | 19%<br>13100                             | 13%<br>8950      | 1%<br>559                     | 0.008%<br>5       |
| Ce (Gg) | 2014       | 100%<br>63.6    | 72%<br>45.9                              | 28%<br>17.7             | 10%<br>6.66                        |                    |                |                          |             | 62%<br>39.2                              |                  |                               | 2%<br>1           |
| Co (Gg) | 2014       | 100%<br>246     | 37%<br>91.3                              | 63%<br>154              |                                    |                    | 8%<br>20.3     | 3%<br>8.21               |             | 26%<br>62.8                              |                  |                               | 0.003%<br>0.006   |
| Cu (Gg) | 2014       | 100%<br>22400   | 82%<br>18300                             | 18%<br>4110             |                                    | 3%<br>756          | 27%<br>6120    |                          |             | 38%<br>8620                              |                  | 12%<br>2800                   | 0.002%<br>0.5     |
| Fe (Gg) | 2014       | 100%<br>1650000 | 83%<br>1360000                           | 17%<br>285000           |                                    | 2%<br>41100        | 61%<br>1000000 |                          |             | 19%<br>316000                            |                  |                               | 0.000002%<br>0.03 |
| Ni (Gg) | 2014       | 100%<br>2810    | 71%<br>1990                              | 29%<br>820              |                                    |                    | 45%<br>1260    | 11%<br>322               |             | 15%<br>414                               |                  |                               | 0.0007%<br>0.02   |
| Zn (Gg) | 2014       | 100%<br>15300   | 82%<br>12500                             | 18%<br>2800             |                                    | 11%<br>1660        | 33%<br>5040    |                          |             | 38%<br>5800                              |                  |                               | 0.2%<br>26        |

**Table S6.** All masses are rounded to three significant digits with the exception of nanomaterial flows.

| Element | Data Source                                                                                                                                           | 2014 World Mine, Smelter, and/or Refinery Production (Gg)        | Data                                                                      |
|---------|-------------------------------------------------------------------------------------------------------------------------------------------------------|------------------------------------------------------------------|---------------------------------------------------------------------------|
| Ag      | U.S. Geological Survey Minerals Yearbook 2014 <sup>5</sup>                                                                                            | Mine Production: 26.8                                            | Includes data available through April 4, 2016.                            |
| Al      | U.S. Geological Survey Minerals Yearbook 2015 <sup>7</sup>                                                                                            | Primary Smelter Production: 54000                                | Includes data available through October 6, 2016                           |
| Au      | U.S. Geological Survey Mineral Commodity Summaries 2016 <sup>25</sup>                                                                                 | Mine Production: 2.99                                            | Published January 2016                                                    |
| Bi      | U.S. Geological Survey Minerals Yearbook 2015-Advance Data Release <sup>26</sup>                                                                      | Mine Production: 10.6                                            | Includes data available through August 8, 2016.                           |
| Ce      | U.S. Geological Survey Minerals Yearbook 2014 <sup>11</sup>                                                                                           | Mine Production: 50.9                                            | Includes data available through August 26, 2016.                          |
| Co      | U.S. Geological Survey Minerals Yearbook 2014 <sup>13</sup>                                                                                           | Mine Production: 123<br>Primary Refinery Production: 91.3        | Includes data available through November 2, 2015.                         |
| Cu      | U.S. Geological Survey Minerals Yearbook 2014 <sup>15</sup>                                                                                           | Mine Production: 18500<br>Primary Refinery Production: 18300     | Includes data available through May 9, 2016.                              |
| Fe      | U.S. Geological Survey Minerals Yearbook 2014-Preliminary <sup>18</sup>                                                                               | Mine Production: 1430000                                         | Includes data available through December 15, 2015.                        |
| Mg      | U.S. Geological Survey Mineral Commodity Summaries 2016 <sup>27, 28</sup>                                                                             | Magnesite Mine Production: 8420<br>Primary Metal Production: 970 | Published January 2016                                                    |
| Mn      | U.S. Geological Survey Mineral Commodity Summaries 2016 <sup>29</sup>                                                                                 | Mine Production: 17800                                           | Published January 2016                                                    |
| Ni      | U.S. Geological Survey Mineral Commodity Summaries 2016 <sup>20</sup><br>International Nickel Study Group, World Nickel Statistics 2015 <sup>21</sup> | Mine Production: 2450<br>Primary Smelter Production: 1990        | Published January 2016<br>Includes data available through August 27, 2015 |
| Sb      | U.S. Geological Survey Mineral Commodity Summaries 2016 <sup>30</sup>                                                                                 | Mine Production: 158                                             | Published January 2016                                                    |
| Si      | U.S. Geological Survey Mineral Commodity Summaries 2016 <sup>31</sup><br>U.S. Geological Survey Minerals Yearbook 2014 <sup>32</sup>                  | Silicon Production: 8110<br>Silicon Metal Production: 2600       | Published January 2016<br>Includes data available through July 30, 2015.  |
| Sn      | U.S. Geological Survey Mineral Commodity Summaries 2016 <sup>33</sup>                                                                                 | Mine Production: 286                                             | Published January 2016                                                    |
| Ti      | U.S. Geological Survey Mineral Commodity Summaries 2016 <sup>34</sup>                                                                                 | Mine Production: 3620                                            | Published January 2016                                                    |
| Zn      | U.S. Geological Survey Minerals Yearbook 2014 <sup>23</sup>                                                                                           | Mine Production: 13300                                           | Includes data available through November 5, 2015.                         |
| Zr      | U.S. Geological Survey Minerals Yearbook 2014 <sup>35</sup>                                                                                           | Mine Production: 671                                             | Includes data available through April 21, 2016.                           |

**Table S7.** All values expressed in content of particular element and rounded to three significant digits. CeO<sub>2</sub> content of rare earth oxides assumed to be 50%<sup>8,9</sup>; approximate cobalt primary refinery production; total magnesium production is assumed to be the sum of magnesite mine production and Mg metal; a fraction of Mg metal is produced from magnesite; dolomite ore production not available; Si content of Si metal assumed to be ca. 100%; Ti mine production is the combination of ilmenite and rutile; ZrO<sub>2</sub> content of Zr mineral concentrates assumed to be ca. 63%<sup>24</sup>.

## References (SI)

- 1 Future Markets Inc., *The Global Market for Nanotechnology and Nanomaterials*, 2016.
- 2 F. Cardarelli, *Materials handbook*, Springer-Verlag London Limited, 2008.
- 3 B. K. Reck and T. E. Graedel, *Science* (80-. ), 2012, **337**, 690–695.
- 4 J. Johnson, J. Jirikowic, M. Bertram, D. Van Beers, R. B. Gordon, K. Henderson, R. J. Klee, T. Lanzano, R. Lifset, L. Oetjen and T. E. Graedel, *Environ. Sci. Technol.*, 2005, **39**, 4655–4665.
- 5 U.S. Geological Survey, *2014 USGS Minerals Yearbook, Silver, Vol. I. Metals and Minerals*, 2016.
- 6 G. Liu, C. E. Bangs and D. B. Müller, *Nat. Clim. Chang.*, 2012, **3**, 338–342.
- 7 U.S. Geological Survey, *2015 USGS Minerals Yearbook, Aluminum, Vol. I. Metals and Minerals*, 2016.
- 8 D. I. Bleiwas and J. Gambogi, *USGS Preliminary Estimates of the Quantities of Rare-Earth Elements Contained in Selected Products and in Imports of Semimanufactured Products to the United States, 2010*, 2013.
- 9 L. Z. H. I. Li and X. Yang, *1st Eur. Rare Earth Resour. Conf.*, 2014, 26–36.
- 10 X. Du and T. E. Graedel, *Sci. Rep.*, 2011, **1**, 145.
- 11 U.S. Geological Survey, *2014 USGS Minerals Yearbook, Rare Earths, Vol. I. Metals and Minerals*, 2016.
- 12 E. M. Harper, G. Kavlak and T. E. Graedel, *Environ. Sci. Technol.*, 2012, **46**, 1079–1086.
- 13 U.S. Geological Survey, *2014 USGS Minerals Yearbook, Cobalt, Vol. I. Metals and Minerals*, 2016.
- 14 S. Glöser, M. Soulier and L. A. Tercero Espinoza, *Environ. Sci. Technol.*, 2013, **47**, 6564–6572.
- 15 U.S. Geological Survey, *2014 USGS Minerals Yearbook, Copper, Vol. I. Metals and Minerals*, 2016.
- 16 International Copper Study Group, *The World Copper Factbook*, 2015.
- 17 T. Wang, D. B. Muller and T. E. Graedel, *Environ. Sci. Technol.*, 2007, **41**, 5120–5129.
- 18 U.S. Geological Survey, *2014 USGS Minerals Yearbook, Iron Ore, Vol. I. Metals and Minerals*, 2017.
- 19 B. K. Reck and V. S. Rotter, *J. Ind. Ecol.*, 2012, **16**, 518–528.
- 20 P. H. Kuck, *2016 USGS Mineral Commodity Summaries, Nickel*, 2016.
- 21 International Nickel Study Group (INSG), *World Nickel Statistics 2015*, 2015.
- 22 G. Meylan and B. K. Reck, *Resour. Conserv. Recycl.*, 2015, 1–10.
- 23 U.S. Geological Survey, *2014 USGS Minerals Yearbook, Zinc, Vol. I. Metals and Minerals*, 2016.
- 24 H. Elsner, *Zircon – insufficient supply in the future?*, Berlin, The German Mineral Resources Agency (DERA), Federal Institute for Geosciences and Natural Resources, 2013.
- 25 M. W. George, *2016 USGS Mineral Commodity Summaries, Gold*, 2016.
- 26 U.S. Geological Survey, *2015 USGS Minerals Yearbook, Bismuth, Vol. I. Metals and Minerals*, 2017.

- 27 E. Lee Bray, *2016 USGS Mineral Commodity Summaries, Magnesium Metal*, 2016.
- 28 E. L. Bray, *2016 USGS Mineral Commodity Summaries, Magnesium Compounds*, 2016.
- 29 L. A. Corathers, *2016 USGS Mineral Commodity Summaries, Manganese*, 2016.
- 30 D. E. Guberman, *2016 USGS Mineral Commodity Summaries, Antimony*, 2016.
- 31 U.S. Geological Survey, *2014 USGS Minerals Yearbook, Silicon, Vol. I. Metals and Minerals*, 2016.
- 32 Emily K. Schnebele, *2016 USGS Mineral Commodity Summaries, Silicon*, 2016.
- 33 C. S. Anderson, *2016 USGS Mineral Commodity Summaries, Tin*, 2016.
- 34 G. M. Bedinger, *2016 USGS Mineral Commodity Summaries, Titanium Mineral Concentrates*, 2016.
- 35 U.S. Geological Survey, *2014 USGS Minerals Yearbook, Zirconium and Hafnium, Vol. I. Metals and Minerals*, 2016.
