# Supplementary material for: Engineered nanomaterials in the context of global element cycles
Source: Royal Society of Chemistry journal article supplement (doi:10.1039/c9en00322c), 2019-01-01

High resolution zoomable Fig. 2 from DOI: 10.1039/C9EN00322C

**Fig. 2** The status and scale of nanotechnologies. (a) Specific applications and/or application categories are listed (enlarge to view or see Table S3 ESI<sup>†</sup>) within the following technology readiness levels: applied R&D: proof of concept and/or lab tested; demonstration: field tested, basic prototype, and/or final prototype; commercial: fully tested and/or in operation. (b) Global production volume estimates for 2015 (log scale). The quantum dot (QD) market was not reported on a mass basis, apart from 2016 and 2020 gross estimates (refer to Table S6<sup>†</sup>); the global quantum dot revenue for the year 2015 was \$400–600m. *d.*: diamonds, *fib.*: fibers, *clay*: clays, *ful.*: fullerenes, ATO: antimony tin oxide ( $\text{SnO}_2/\text{Sb}_2\text{O}_5$ ), QD: quantum dot, *den.*: dendrimers, *cel.*: cellulose, G: graphene, CNT: carbon nanotubes, UV: ultraviolet, MRI: magnetic resonance imaging, LIB: lithium-ion batteries, RFI: radio frequency interference, IR: infrared radiation, SIB: sodium-ion batteries, EMI: electromagnetic interference, LCD: liquid crystal display, TV: television, 3D: three-dimensional, TCF: transparent conductive film, PEM: polymer electrolyte membrane/proton exchange membrane, E-textiles: electronic textiles, ESD: electrostatic discharge, TEM: transmission electron microscopy, SPM: scanning probe microscopy, AFM: atomic force microscopy. Data sourced from Future Markets, Inc., The Global Nanotechnology and Nanomaterials Market Opportunity Report, 2016.<sup>57</sup>

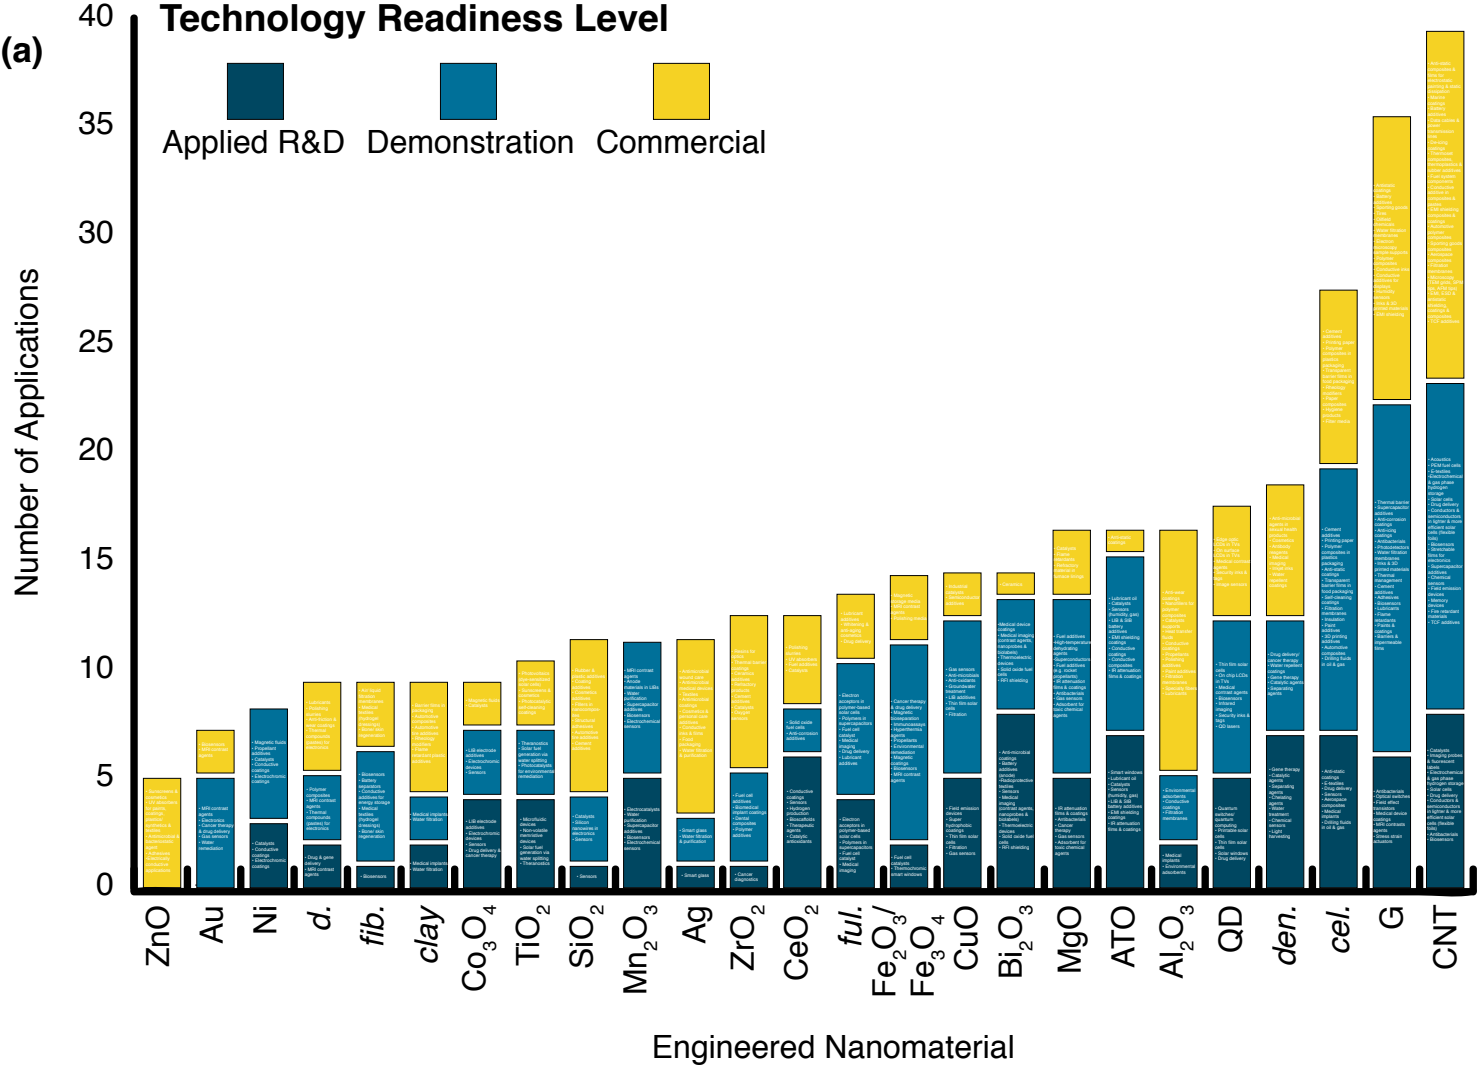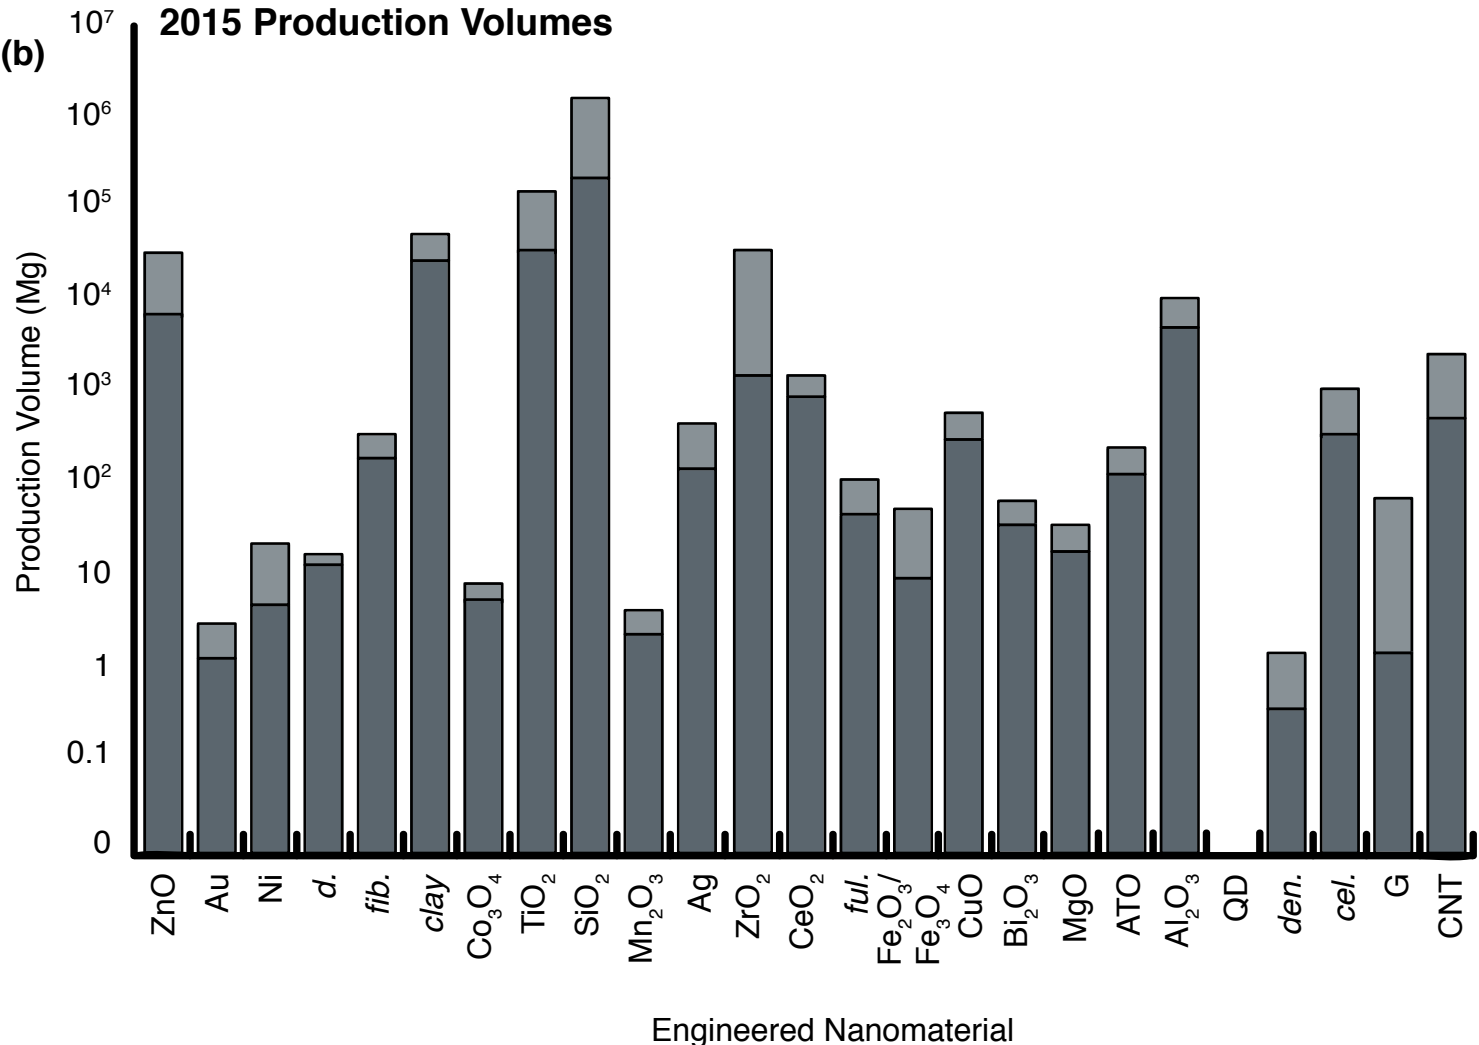

Supplement: c9en00322c2.pdf [file c9en00322c2.pdf]
